# Supplementary material
Source: PubMed Central journal article supplement (PMC4516717)

Neocortex

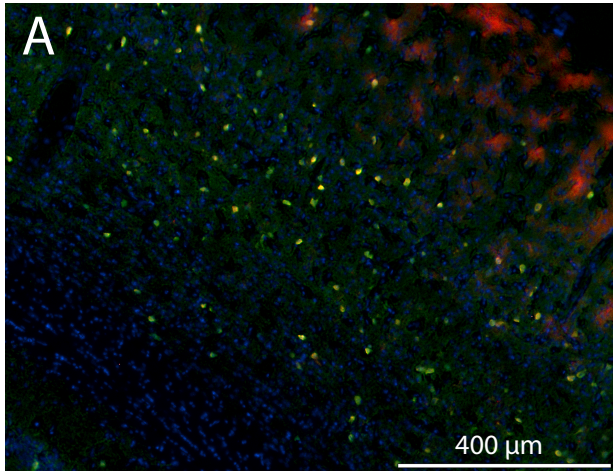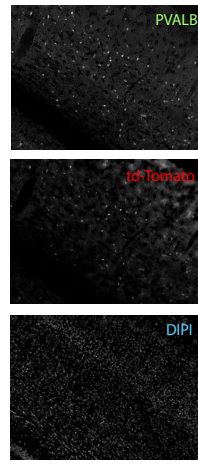

Hippocampus

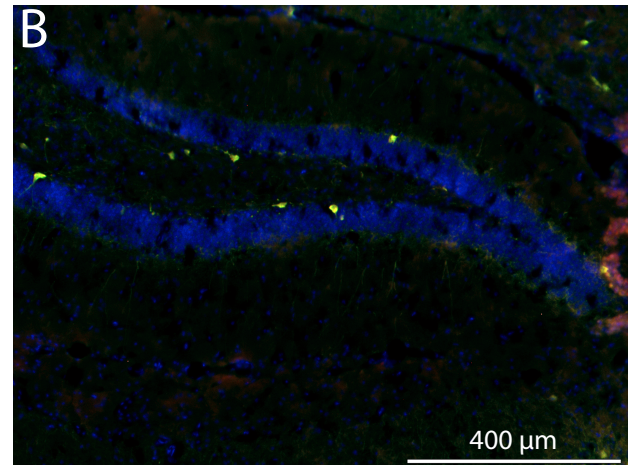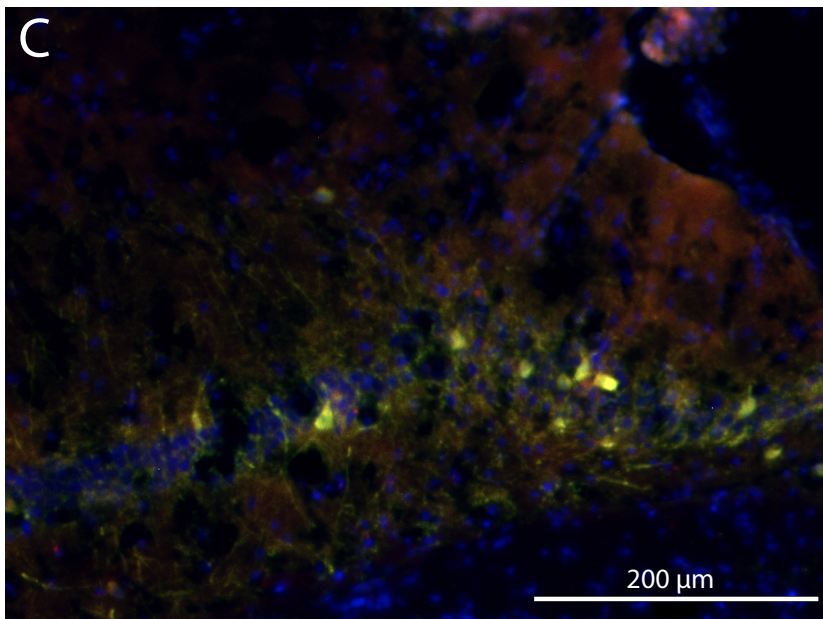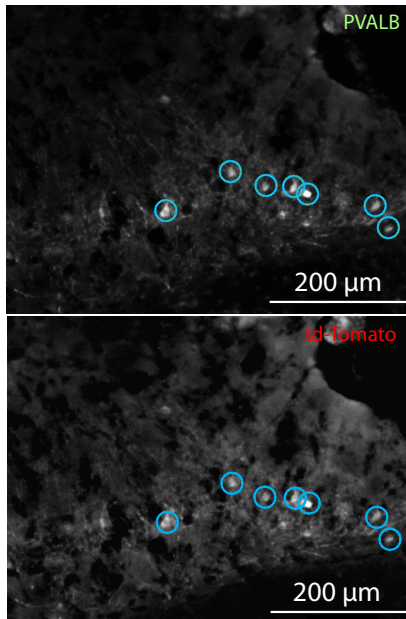

Supplement: NIHMS647915-supplement-1.pdf [file NIHMS647915-supplement-1.pdf]

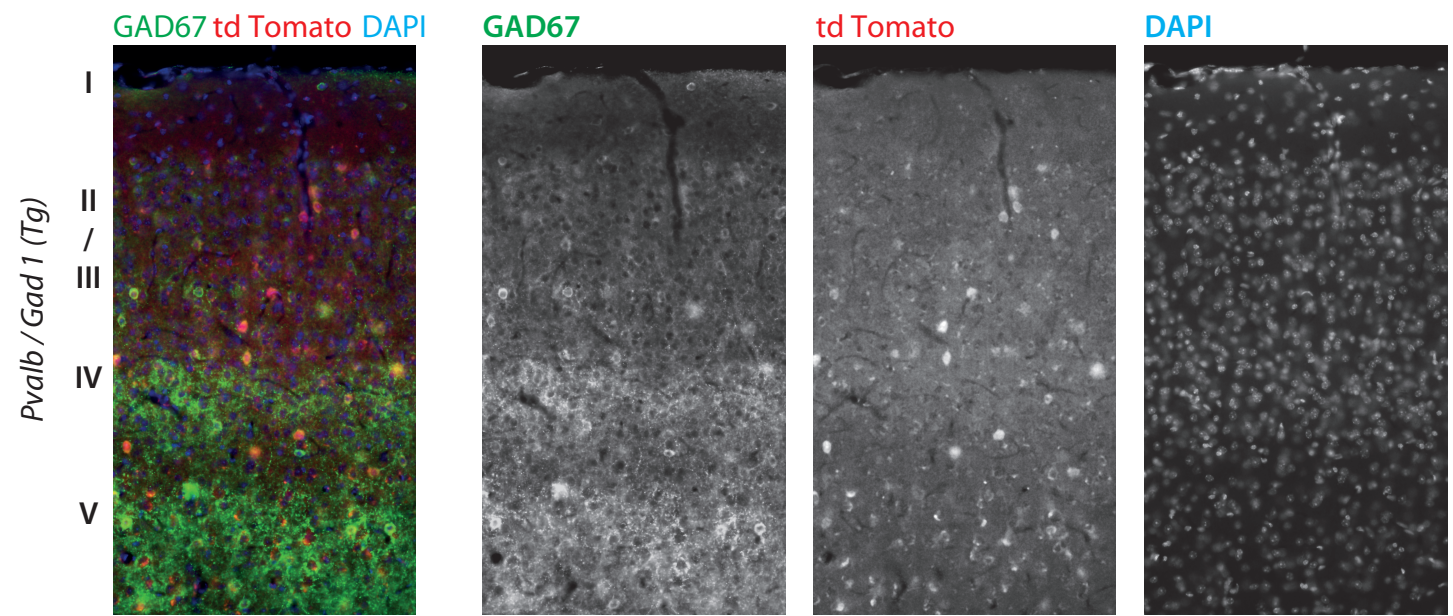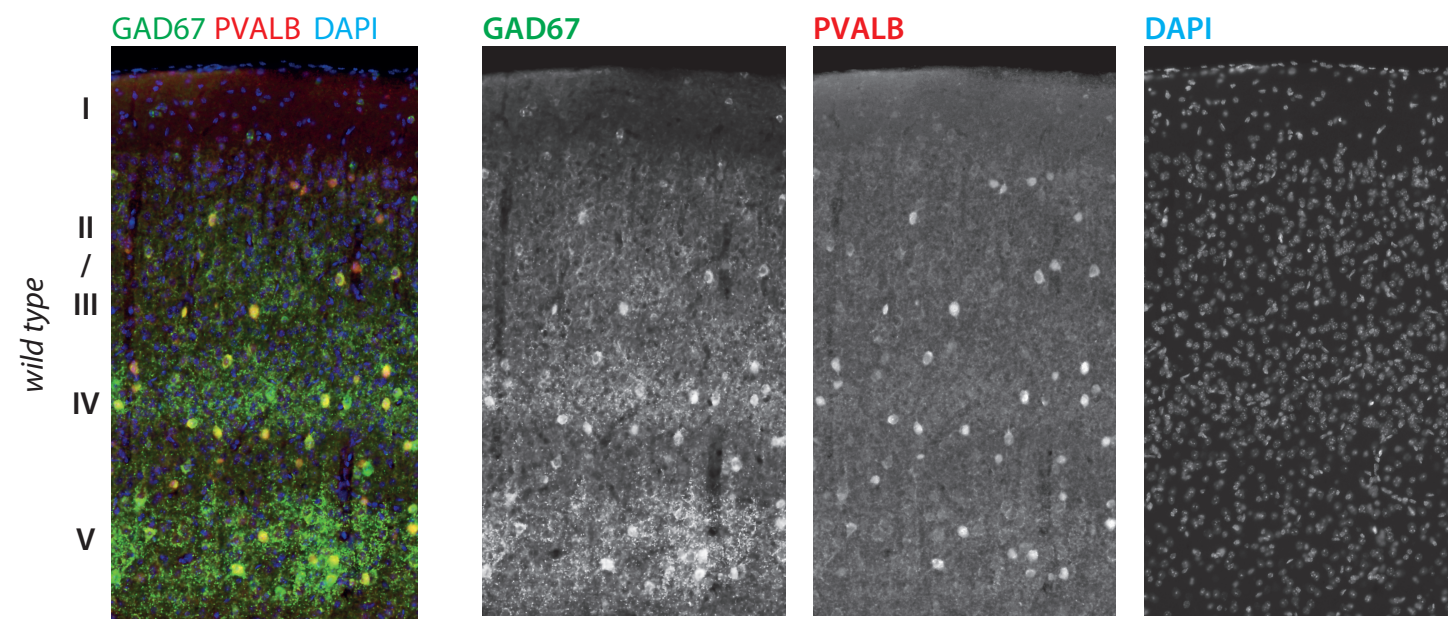

Supplement: NIHMS647915-supplement-2.pdf [file NIHMS647915-supplement-2.pdf]

td Tomato

PVALB

*hippocampus*

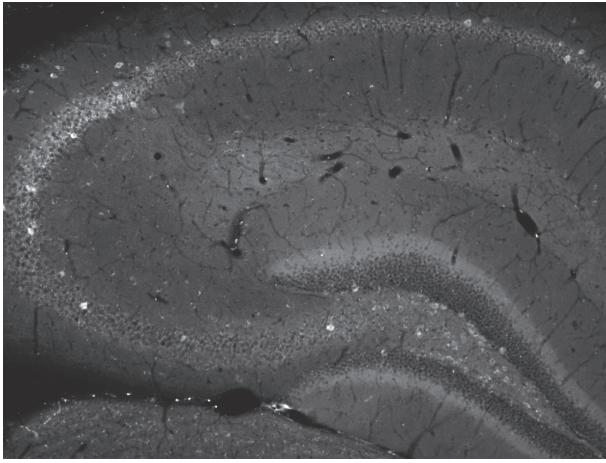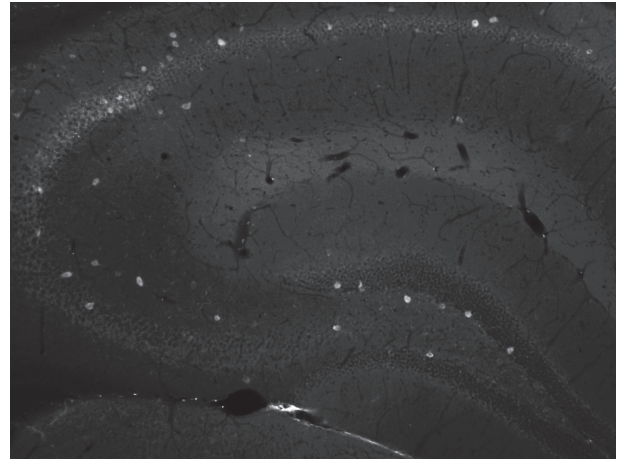

*cortex  
superficial layers*

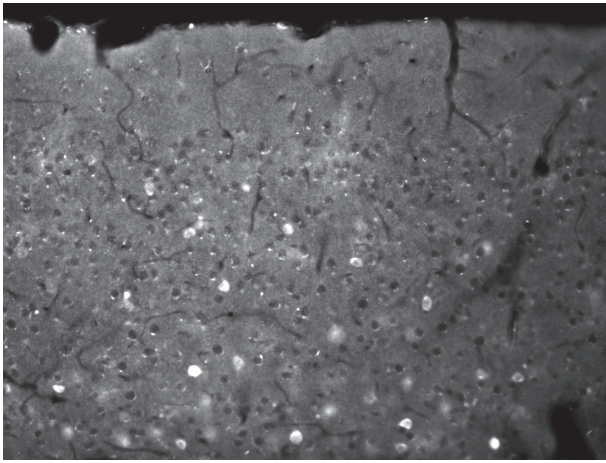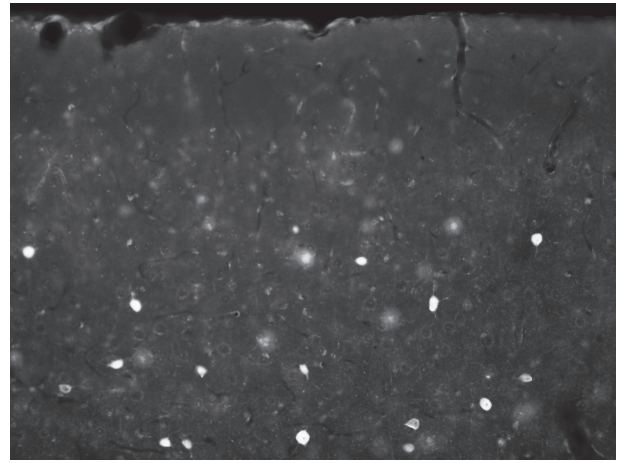

*nucleus reticularis  
thalami*

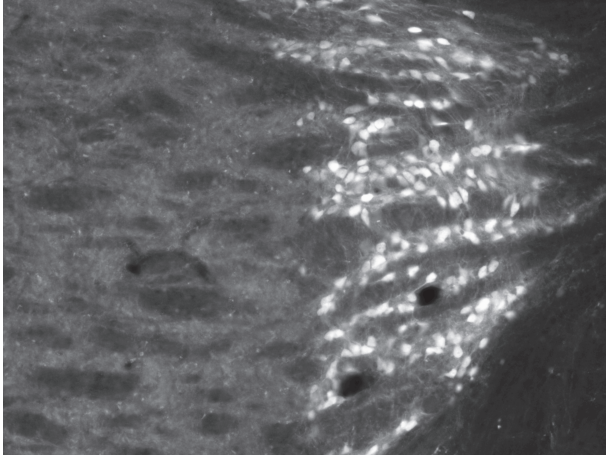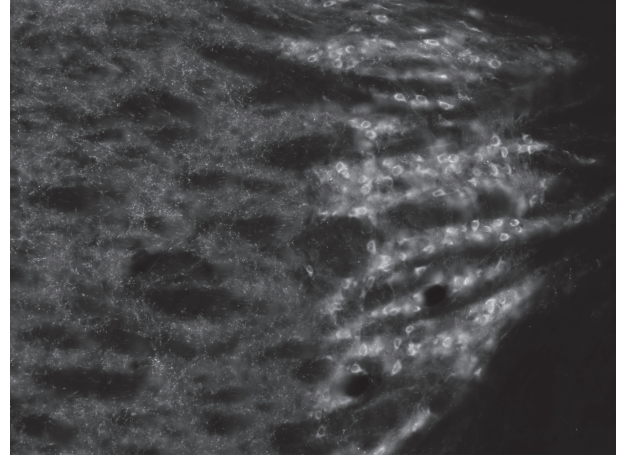

Supplement: NIHMS647915-supplement-3.pdf [file NIHMS647915-supplement-3.pdf]

Wt

Tg

CCK

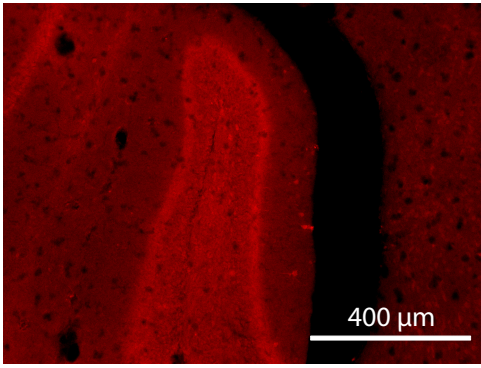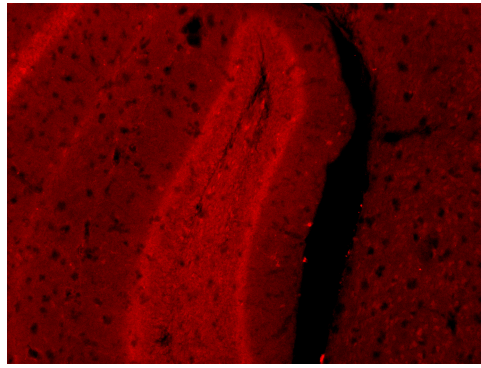

NPY

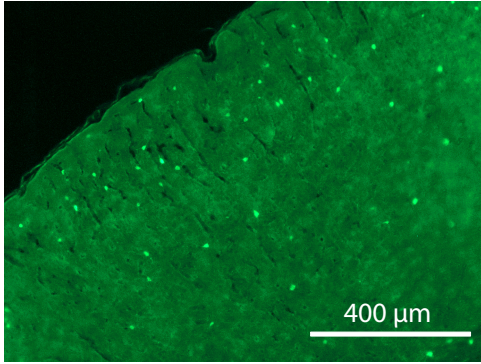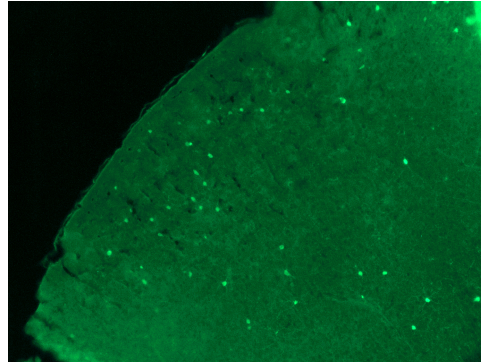

Supplement: NIHMS647915-supplement-4.pdf [file NIHMS647915-supplement-4.pdf]

**A**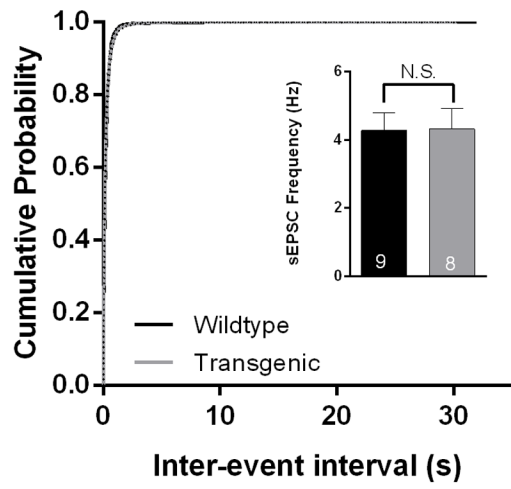**B**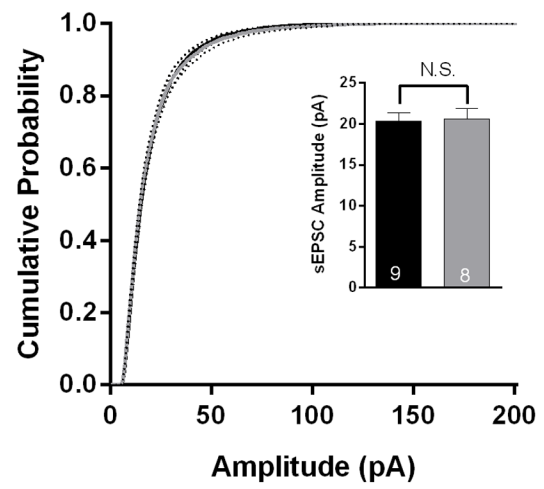

Supplement: NIHMS647915-supplement-5.pdf [file NIHMS647915-supplement-5.pdf]

**A**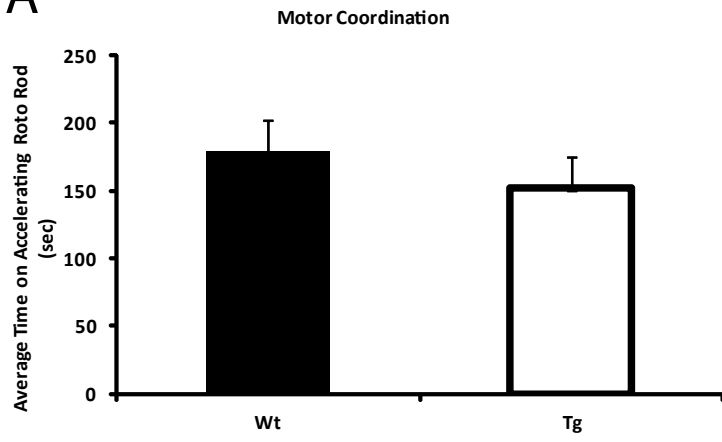**B**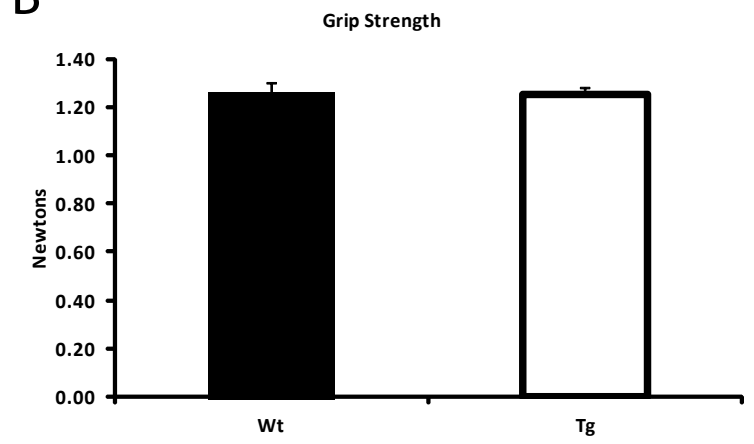**C**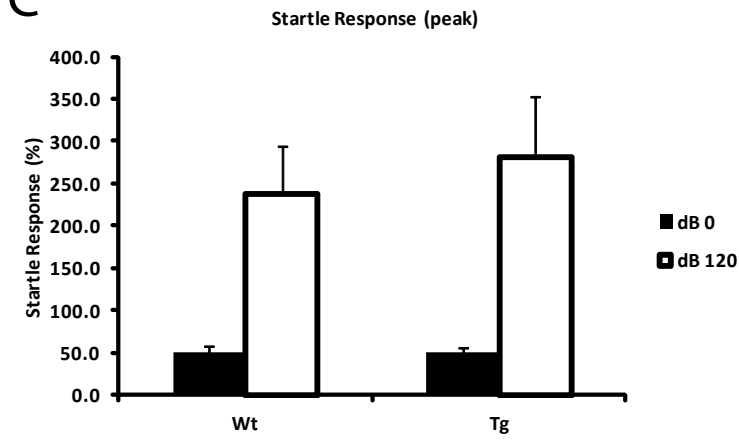**D**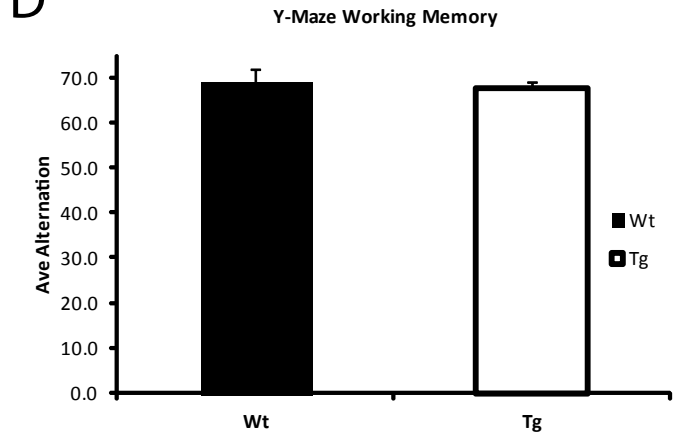

Supplement: NIHMS647915-supplement-6.pdf [file NIHMS647915-supplement-6.pdf]
